# Supplementary material for: Dimer formation of GdDO3A-arylsulfonamide complexes causes loss of pH-dependency of relaxivity
Source: Royal Society of Chemistry journal article supplement (doi:10.1039/c7dt02985c), 2017-01-01
Supplement: c7dt02985c1.pdf [file c7dt02985c1.pdf]

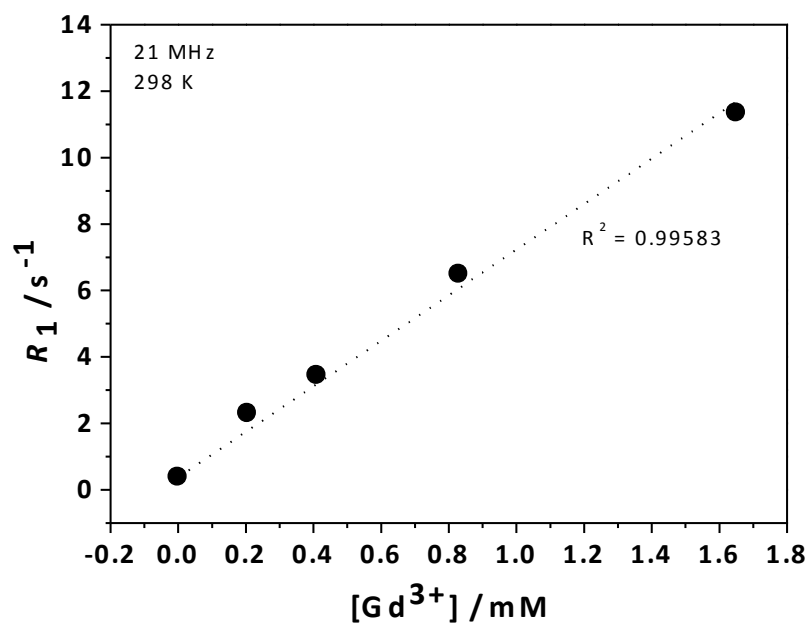

**Figure S1.**  $R_1$  value of Gd-7 at different concentrations

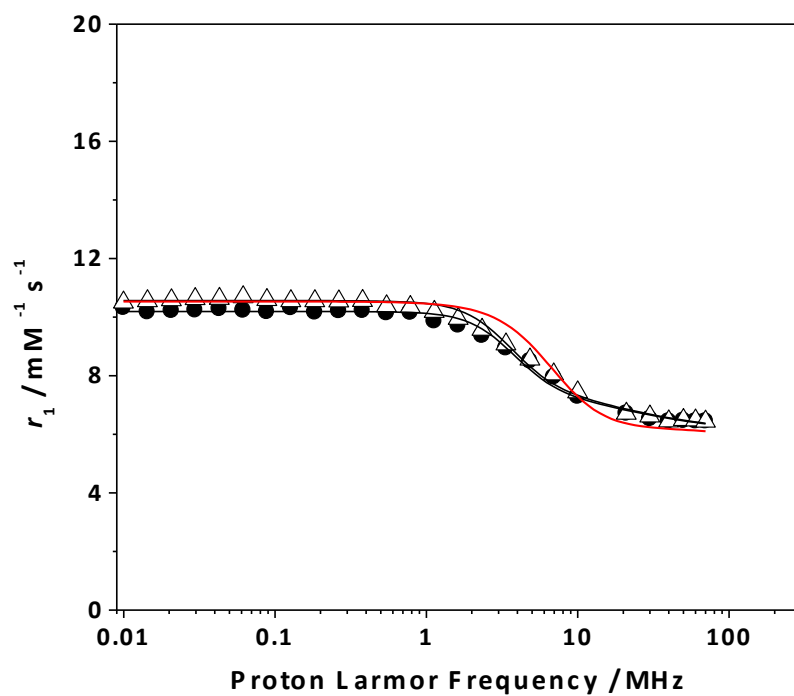

**Figure S2.** <sup>1</sup>H NMRD profiles of Gd-5 (solid circles) and Gd-7 (open triangles). The red line represent the best fitting results of the experimental data points by using  $q = 2$  (Table S1).

**Table S1:** Best-fit parameters obtained from the analysis of the  $1/T_1$   $^1\text{H}$  NMRD profiles collected at 298 K and  $^{17}\text{O}$  NMR data using  $q = 2$

| Parameter                                       | Gd-7           |
|-------------------------------------------------|----------------|
| $^{298}\tau_{\text{M}} / \text{ns}$             | $40 \pm 8$     |
| $\Delta H_{\text{M}}^{\#} / \text{kJ mol}^{-1}$ | $42.3 \pm 1.2$ |
| $A/\hbar / 10^6 \text{ rad s}^{-1}$             | $-3.1 \pm 0.1$ |
| $^{298}\tau_{\text{R}} / \text{ps}$             | $68 \pm 2.0$   |
| $^{298}\tau_{\text{V}} / \text{ps}$             | $19.4 \pm 2.1$ |
| $\Delta^2 / 10^{19} \text{ s}^{-2}$             | $5.9 \pm 0.8$  |

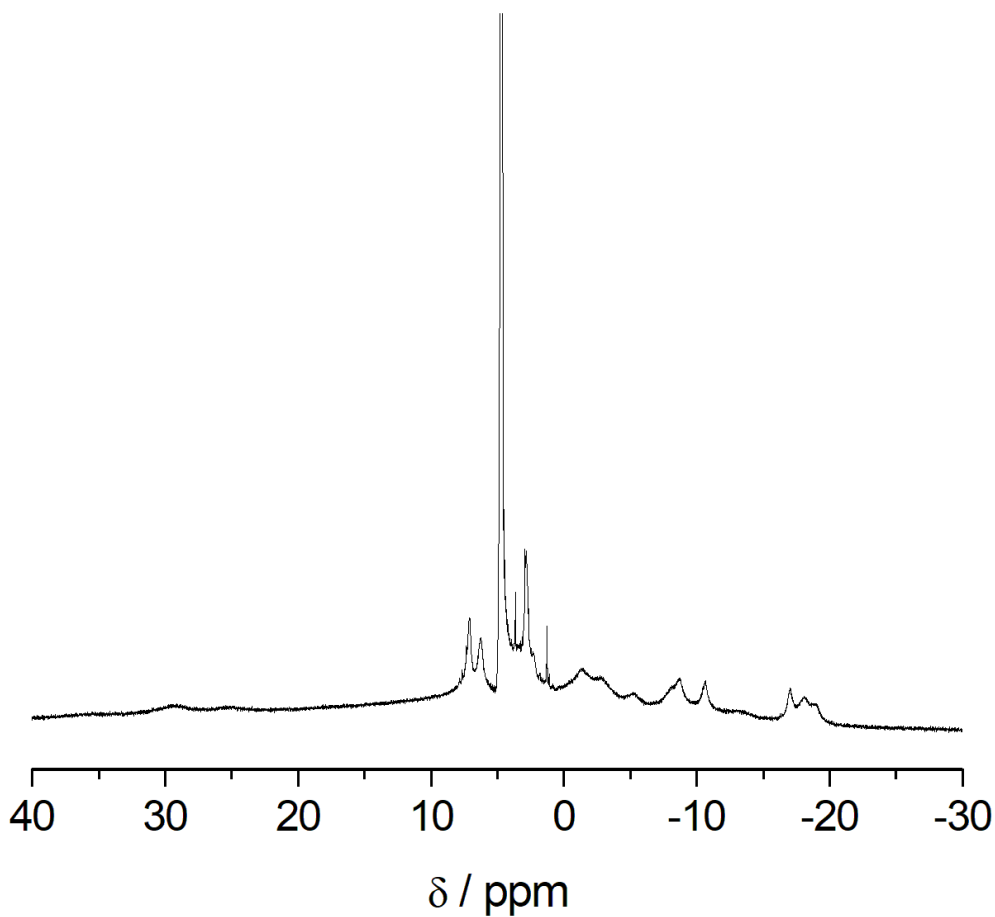

**Figure S3.**  $^1\text{H}$  NMR spectrum of Eu-7.

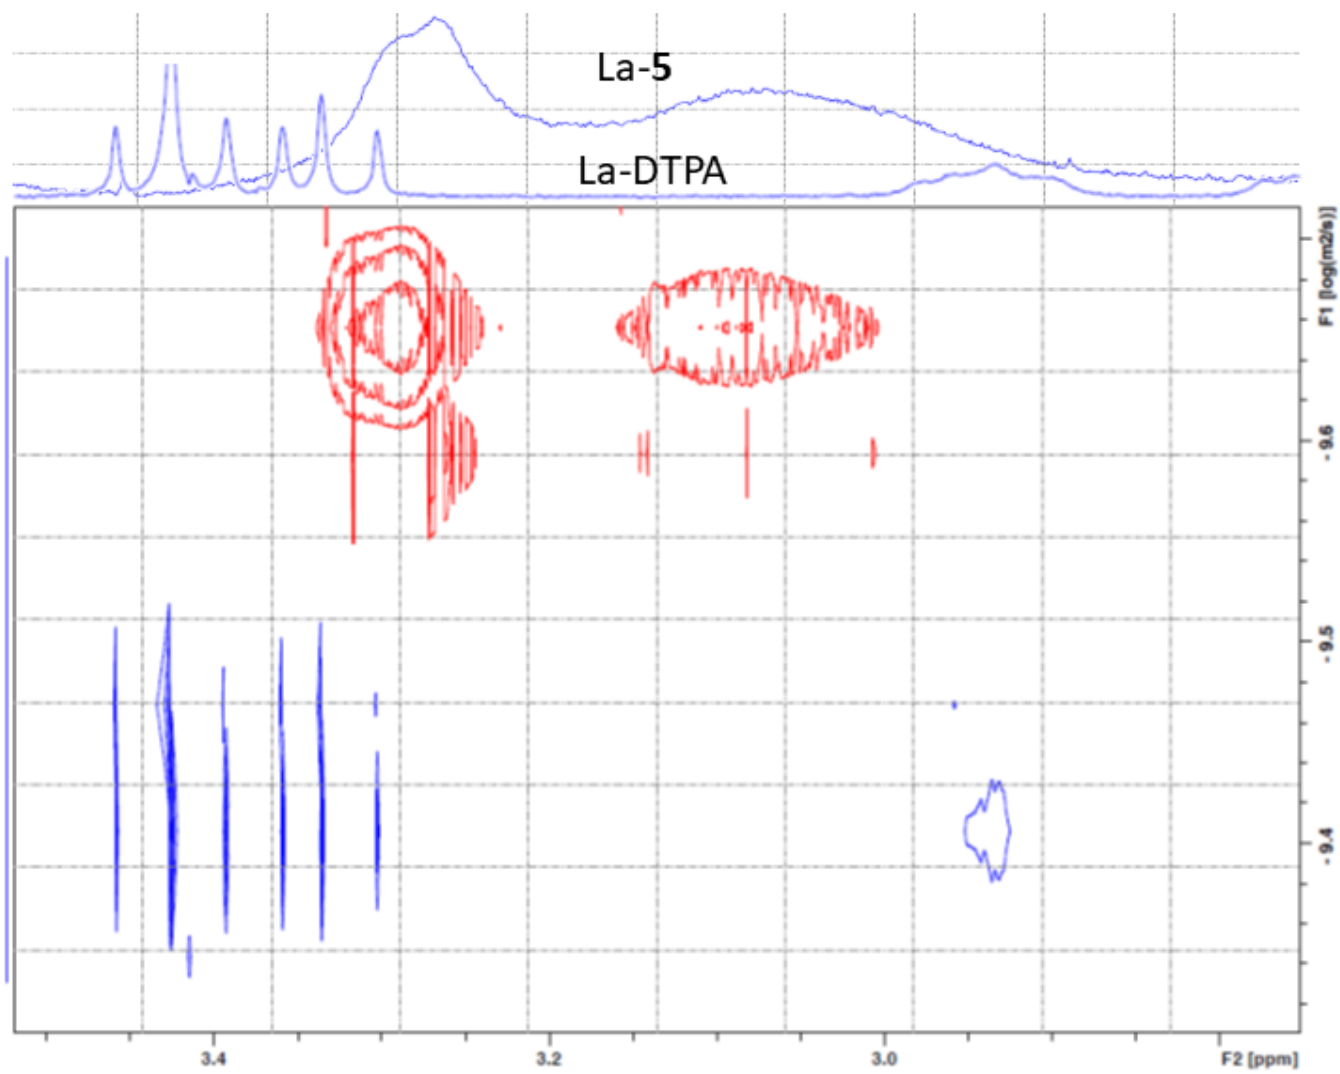

**Figure S4.**  $^1\text{H}$  NMR DOSY spectra of La-5 compared to LaDTPA.

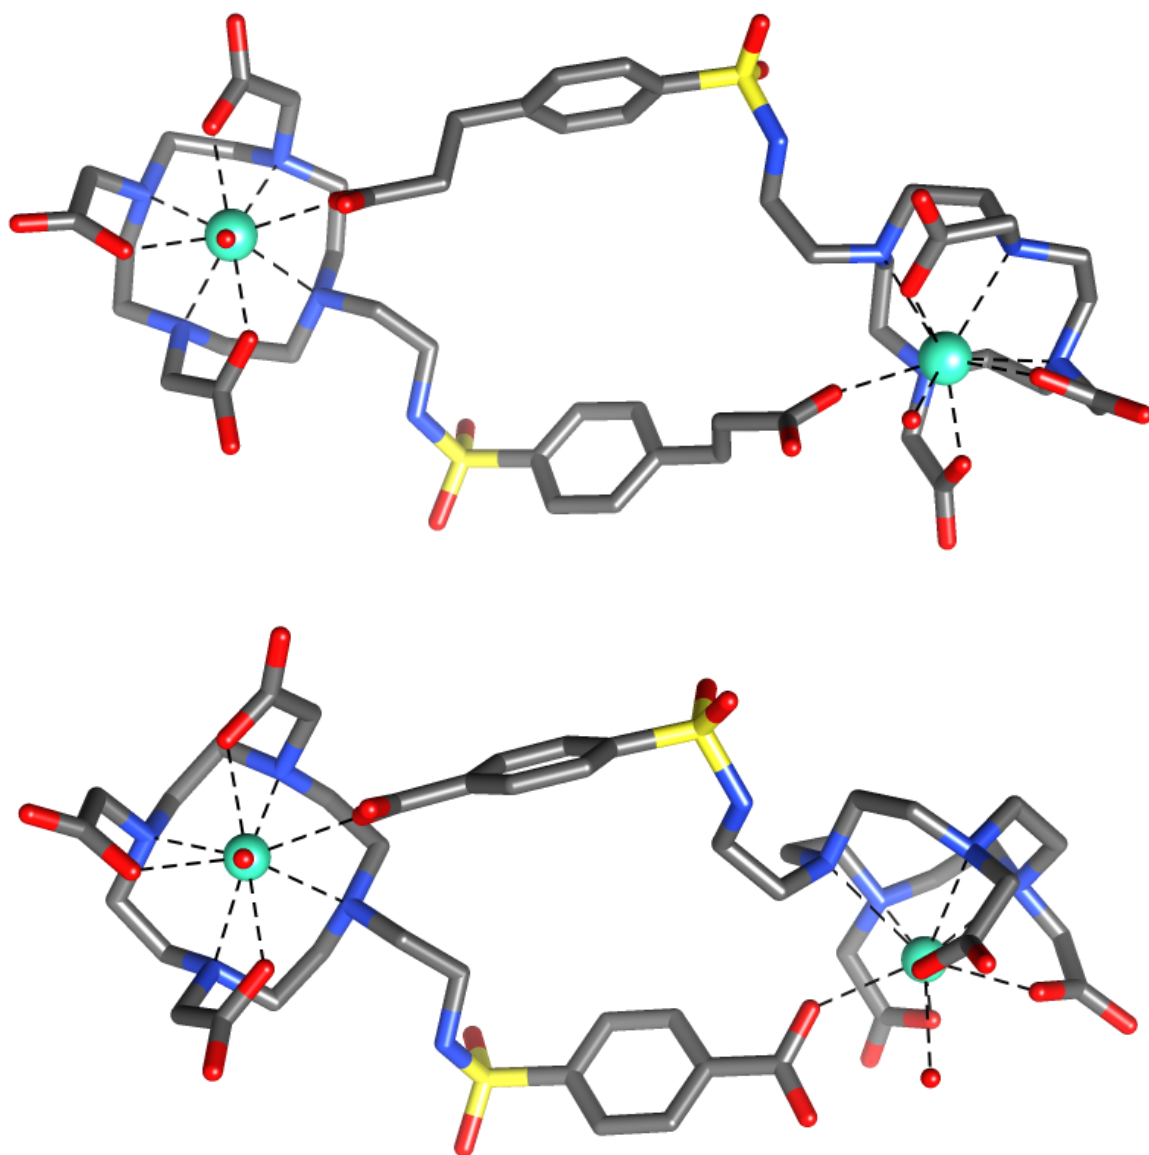

**Figure S5.** Geometries of the SAP conformers of  $[\text{Gd}_2(\mathbf{5})_2(\text{H}_2\text{O})_2]$  and  $[\text{Gd}_2(\mathbf{7})_2(\text{H}_2\text{O})_2]$  (bottom), obtained from DFT calculations at the TPSSh/LCRECP/6-31G(d) level.

**Table S2.** Optimized Cartesian coordinates (Å) obtained for the SAP isomer of [Gd(DO3A-SA-(CH<sub>2</sub>)<sub>2</sub>-COO)(H<sub>2</sub>O)]<sub>2</sub> (TPSSh/LCRECP/6-31G(d) level, aqueous solution, 0 imaginary frequencies).

|   |              |             |             |
|---|--------------|-------------|-------------|
| N | -8.73085600  | 2.03819900  | -0.06312700 |
| C | -10.15895400 | 1.87847800  | 0.32080000  |
| C | -10.37262400 | 0.72781500  | 1.29975600  |
| N | -9.91245800  | -0.58543700 | 0.78092000  |
| C | -9.69786300  | -1.51778500 | 1.91904200  |
| C | -8.36045100  | -1.26951700 | 2.61084500  |
| N | -7.19415800  | -1.44818800 | 1.70835500  |
| C | -5.97533300  | -0.84916800 | 2.31943000  |
| C | -5.97033300  | 0.67961200  | 2.30338400  |
| N | -5.95757200  | 1.24916900  | 0.93127300  |
| C | -6.49099600  | 2.63637200  | 0.92890100  |
| C | -8.00740100  | 2.69648600  | 1.05128200  |
| C | -8.63298400  | 2.85339400  | -1.29849600 |
| C | -7.33793800  | 2.64151800  | -2.10243100 |
| O | -6.82576500  | 1.45076900  | -2.03723200 |
| O | -6.91006300  | 3.57474800  | -2.79520900 |
| C | -10.90911000 | -1.14016000 | -0.16402100 |
| C | -10.81473400 | -0.52944400 | -1.57270600 |
| O | -11.83028800 | -0.51975800 | -2.28540600 |
| O | -9.64082600  | -0.11348500 | -1.91954100 |
| C | -6.97169100  | -2.89371900 | 1.45415700  |
| C | -7.83267700  | -3.48641500 | 0.32222800  |
| O | -8.04644000  | -4.70857600 | 0.33696800  |
| O | -8.22060200  | -2.65943600 | -0.59314300 |
| C | -4.59391800  | 1.22045900  | 0.33868500  |
| C | -3.49706800  | 2.10082000  | 0.96935500  |
| H | -9.44597200  | 2.53764900  | -1.96041800 |
| H | -8.76377700  | 3.92327600  | -1.08324700 |
| H | -11.93318400 | -1.03332200 | 0.22147600  |
| H | -10.69354300 | -2.20658500 | -0.28028000 |
| H | -7.11139600  | -3.48342700 | 2.37095300  |
| H | -5.93571000  | -3.01441300 | 1.12818800  |
| H | -4.25004300  | 0.18710100  | 0.38193800  |
| H | -4.70707700  | 1.46720400  | -0.72207500 |
| H | -10.73330800 | 1.70590200  | -0.58988800 |
| H | -10.54338800 | 2.80371700  | 0.77891300  |
| H | -11.44272500 | 0.67869300  | 1.55686000  |
| H | -9.83976000  | 0.92864800  | 2.23236200  |
| H | -10.50405500 | -1.42182100 | 2.66286500  |
| H | -9.73976800  | -2.53855600 | 1.53428200  |
| H | -8.27396800  | -1.94587400 | 3.47626800  |
| H | -8.33569000  | -0.25054200 | 3.00495400  |
| H | -5.85379000  | -1.19189400 | 3.35913300  |
| H | -5.12430600  | -1.21727300 | 1.74269800  |
| H | -6.84806400  | 1.06948900  | 2.82401200  |
| H | -5.10271500  | 1.02232400  | 2.88604300  |
| H | -6.16684600  | 3.11363300  | 0.00248800  |
| H | -6.05671800  | 3.22505200  | 1.74940000  |
| H | -8.32077800  | 2.22044500  | 1.98367600  |
| H | -8.30763800  | 3.75496800  | 1.12152100  |
| H | -2.52615100  | 1.68285000  | 0.66764100  |
| H | -3.54086600  | 2.08586500  | 2.06097900  |
| N | -3.61599800  | 3.51377100  | 0.55361300  |
| H | -3.55394500  | 3.64435900  | -0.45795700 |

|    |             |             |             |
|----|-------------|-------------|-------------|
| O  | -7.21622700 | -0.99969500 | -3.08802000 |
| H  | -6.28569100 | -1.41298000 | -3.07746200 |
| H  | -7.06950700 | -0.06362500 | -3.33951700 |
| S  | -2.65160300 | 4.64799500  | 1.33055800  |
| O  | -2.98714400 | 5.93808500  | 0.70689500  |
| O  | -2.85568100 | 4.42817100  | 2.77206500  |
| C  | -0.94252100 | 4.28578200  | 0.95697100  |
| C  | -0.34165200 | 4.89638000  | -0.15069000 |
| C  | -0.23787400 | 3.37181600  | 1.74901800  |
| C  | 0.98002000  | 4.58188400  | -0.46222200 |
| H  | -0.89713800 | 5.61578900  | -0.74308300 |
| C  | 1.08288600  | 3.06525800  | 1.41612800  |
| H  | -0.70697200 | 2.92676400  | 2.62031900  |
| C  | 1.70905500  | 3.65964500  | 0.30880000  |
| H  | 1.45503200  | 5.06360500  | -1.31301700 |
| H  | 1.63651800  | 2.36099400  | 2.03172800  |
| C  | 3.12636000  | 3.29349500  | -0.07232700 |
| Gd | -7.63477900 | -0.36266700 | -0.69595900 |
| N  | 8.73066400  | -2.03863500 | -0.06307100 |
| C  | 10.15885000 | -1.87892700 | 0.32054900  |
| C  | 10.37274200 | -0.72817400 | 1.29936000  |
| N  | 9.91265900  | 0.58510600  | 0.78053100  |
| C  | 9.69828700  | 1.51748700  | 1.91865700  |
| C  | 8.36095800  | 1.26933300  | 2.61064200  |
| N  | 7.19458100  | 1.44811100  | 1.70825600  |
| C  | 5.97571700  | 0.84931800  | 2.31950600  |
| C  | 5.97053600  | -0.67947600 | 2.30362600  |
| N  | 5.95772000  | -1.24921900 | 0.93157800  |
| C  | 6.49094600  | -2.63648700 | 0.92941100  |
| C  | 8.00734500  | -2.69671300 | 1.05155700  |
| C  | 8.63246900  | -2.85394300 | -1.29833700 |
| C  | 7.33703300  | -2.64220700 | -2.10165500 |
| O  | 6.82553500  | -1.45109300 | -2.03723000 |
| O  | 6.90845000  | -3.57567700 | -2.79367500 |
| C  | 10.90923500 | 1.13972900  | -0.16453300 |
| C  | 10.81448900 | 0.52937900  | -1.57336000 |
| O  | 11.82971600 | 0.52084300  | -2.28655500 |
| O  | 9.64076100  | 0.11263000  | -1.91977400 |
| C  | 6.97231100  | 2.89366800  | 1.45394700  |
| C  | 7.83311600  | 3.48615500  | 0.32176400  |
| O  | 8.04718700  | 4.70827000  | 0.33648600  |
| O  | 8.22067900  | 2.65911600  | -0.59369200 |
| C  | 4.59407100  | -1.22039400 | 0.33894700  |
| C  | 3.49712200  | -2.10059100 | 0.96965300  |
| H  | 9.44516300  | -2.53808900 | -1.96057200 |
| H  | 8.76344900  | -3.92379100 | -1.08303400 |
| H  | 11.93336400 | 1.03254400  | 0.22072400  |
| H  | 10.69401300 | 2.20624900  | -0.28053800 |
| H  | 7.11230400  | 3.48343700  | 2.37066100  |
| H  | 5.93627300  | 3.01451600  | 1.12820700  |
| H  | 4.25031400  | -0.18698500 | 0.38207700  |
| H  | 4.70722500  | -1.46727100 | -0.72177900 |
| H  | 10.73299300 | -1.70645600 | -0.59028600 |
| H  | 10.54332400 | -2.80414800 | 0.77866500  |
| H  | 11.44287700 | -0.67915600 | 1.55632900  |
| H  | 9.83998200  | -0.92889200 | 2.23205500  |
| H  | 10.50458700 | 1.42147600  | 2.66236400  |
| H  | 9.74019900  | 2.53825500  | 1.53388700  |

|    |             |             |             |
|----|-------------|-------------|-------------|
| H  | 8.27466600  | 1.94574400  | 3.47603600  |
| H  | 8.33612800  | 0.25037000  | 3.00479400  |
| H  | 5.85430600  | 1.19214200  | 3.35919000  |
| H  | 5.12469100  | 1.21747700  | 1.74280700  |
| H  | 6.84823300  | -1.06936900 | 2.82432600  |
| H  | 5.10287100  | -1.02202300 | 2.88629300  |
| H  | 6.16660400  | -3.11390200 | 0.00314500  |
| H  | 6.05669900  | -3.22493800 | 1.75008700  |
| H  | 8.32091700  | -2.22057700 | 1.98383600  |
| H  | 8.30745700  | -3.75523000 | 1.12187700  |
| H  | 2.52623600  | -1.68255900 | 0.66793600  |
| H  | 3.54092700  | -2.08564100 | 2.06127600  |
| N  | 3.61603200  | -3.51356300 | 0.55392500  |
| H  | 3.55435500  | -3.64407500 | -0.45767600 |
| O  | 7.21547800  | 0.99910400  | -3.08783400 |
| H  | 6.28546700  | 1.41376700  | -3.07690400 |
| H  | 7.06760800  | 0.06320600  | -3.33926700 |
| S  | 2.65135300  | -4.64778300 | 1.33050500  |
| O  | 2.98698800  | -5.93782300 | 0.70678600  |
| O  | 2.85509200  | -4.42809500 | 2.77207800  |
| C  | 0.94238800  | -4.28546100 | 0.95655500  |
| C  | 0.34182600  | -4.89568800 | -0.15147200 |
| C  | 0.23753600  | -3.37178000 | 1.74874800  |
| C  | -0.97976100 | -4.58109200 | -0.46325600 |
| H  | 0.89746200  | -5.61490100 | -0.74396100 |
| C  | -1.08315200 | -3.06513000 | 1.41560900  |
| H  | 0.70642200  | -2.92702400 | 2.62031200  |
| C  | -1.70900000 | -3.65913300 | 0.30788300  |
| H  | -1.45456900 | -5.06254400 | -1.31432000 |
| H  | -1.63699500 | -2.36112900 | 2.03132200  |
| C  | -3.12622300 | -3.29287200 | -0.07341400 |
| Gd | 7.63475900  | 0.36228800  | -0.69600500 |
| H  | 3.65247000  | 4.18581200  | -0.43278200 |
| H  | 3.66357600  | 2.92505600  | 0.80684300  |
| H  | -3.65228800 | -4.18499000 | -0.43442700 |
| H  | -3.66365900 | -2.92487900 | 0.80580300  |
| C  | 3.15241400  | 2.21097800  | -1.17518200 |
| H  | 2.67024300  | 1.30208800  | -0.79196200 |
| H  | 2.58149300  | 2.55002200  | -2.04418500 |
| C  | -3.15196900 | -2.20975700 | -1.17567300 |
| H  | -2.58063200 | -2.54814200 | -2.04465200 |
| H  | -2.66999400 | -1.30103200 | -0.79175400 |
| C  | 4.56641800  | 1.85040800  | -1.64055000 |
| O  | 4.82094700  | 1.99103400  | -2.86902600 |
| O  | 5.39055300  | 1.42051100  | -0.75848000 |
| C  | -4.56584400 | -1.84904300 | -1.64137400 |
| O  | -5.39061000 | -1.42074900 | -0.75910100 |
| O  | -4.81963800 | -1.98793200 | -2.87018500 |

---

E(RTPSSh) ==-5021.56476 Hartree

|                                               |              |
|-----------------------------------------------|--------------|
| Zero-point correction =                       | 1.293035     |
| Thermal correction to Energy =                | 1.379007     |
| Thermal correction to Enthalpy =              | 1.379951     |
| Thermal correction to Gibbs Free Energy =     | 1.165884     |
| Sum of electronic and zero-point Energies =   | -5020.271725 |
| Sum of electronic and thermal Energies =      | -5020.185753 |
| Sum of electronic and thermal Enthalpies =    | -5020.184809 |
| Sum of electronic and thermal Free Energies = | -5020.398876 |

**Table S3.** Optimized Cartesian coordinates obtained for the TSAP isomer of [Gd(DO3A-SA-(CH<sub>2</sub>)<sub>2</sub>-COO)(H<sub>2</sub>O)]<sub>2</sub> (TPSSh/LCRECP/6-31G(d) level, aqueous solution, 0 imaginary frequencies).

|    |              |             |             |
|----|--------------|-------------|-------------|
| C  | -8.64105700  | 2.79743800  | -1.38121400 |
| C  | -7.69556100  | 2.35601800  | -2.51207200 |
| O  | -6.98654500  | 1.29318900  | -2.26772400 |
| O  | -7.69612400  | 2.99613000  | -3.57066800 |
| C  | -10.77943400 | -0.94051200 | 0.37549800  |
| C  | -10.79716200 | -0.79723500 | -1.15850900 |
| O  | -11.76584800 | -1.25008400 | -1.78552300 |
| O  | -9.75760100  | -0.21988100 | -1.67240600 |
| C  | -6.78645800  | -2.72143700 | 1.59727300  |
| C  | -7.51625500  | -3.41019800 | 0.42701500  |
| O  | -7.34245200  | -4.62793400 | 0.27113300  |
| O  | -8.23983000  | -2.64045500 | -0.32292900 |
| C  | -4.52649700  | 1.24495900  | -0.07323700 |
| C  | -3.34170500  | 2.05715100  | 0.48553100  |
| H  | -9.62901800  | 2.38905300  | -1.61610800 |
| H  | -8.72017800  | 3.89468000  | -1.37218300 |
| H  | -11.79221100 | -0.78844400 | 0.77788000  |
| H  | -10.47072300 | -1.96456300 | 0.60194200  |
| H  | -6.84100500  | -3.35530600 | 2.49499100  |
| H  | -5.73799300  | -2.63167500 | 1.30883800  |
| H  | -4.16251000  | 0.26777500  | -0.38967100 |
| H  | -4.92478800  | 1.73408300  | -0.96704400 |
| H  | -2.42097200  | 1.72721200  | -0.01242800 |
| H  | -3.21815800  | 1.89223200  | 1.55902600  |
| N  | -3.55018200  | 3.50979800  | 0.29004700  |
| H  | -3.50618400  | 3.79260200  | -0.69070400 |
| O  | -7.43485500  | -1.22054100 | -2.98375100 |
| H  | -6.55765700  | -1.72919300 | -3.00498400 |
| H  | -7.21994300  | -0.31719500 | -3.30469200 |
| S  | -2.63633600  | 4.56644400  | 1.22411900  |
| O  | -2.98455100  | 5.91284500  | 0.74269500  |
| O  | -2.88191800  | 4.17490600  | 2.62241900  |
| C  | -0.90814300  | 4.27500900  | 0.87722300  |
| C  | -0.27650100  | 4.99780500  | -0.14233500 |
| C  | -0.21812600  | 3.29833800  | 1.60444500  |
| C  | 1.06109600   | 4.73116200  | -0.43211700 |
| H  | -0.82008400  | 5.76458000  | -0.68444200 |
| C  | 1.11798700   | 3.04142000  | 1.29389900  |
| H  | -0.71092600  | 2.76498400  | 2.41061700  |
| C  | 1.77533400   | 3.74681400  | 0.27335900  |
| H  | 1.55868400   | 5.29942400  | -1.21378000 |
| H  | 1.65920200   | 2.28727300  | 1.85945700  |
| Gd | -7.62782200  | -0.35699900 | -0.62181000 |
| C  | 8.64099500   | -2.79752800 | -1.38102900 |
| C  | 7.69531800   | -2.35638800 | -2.51184400 |
| O  | 6.98657800   | -1.29330600 | -2.26770600 |
| O  | 7.69552600   | -2.99684100 | -3.57022500 |
| C  | 10.77948100  | 0.94050600  | 0.37540500  |
| C  | 10.79719600  | 0.79713200  | -1.15859100 |
| O  | 11.76588400  | 1.24995300  | -1.78562400 |
| O  | 9.75765800   | 0.21971100  | -1.67244900 |
| C  | 6.78651100   | 2.72161000  | 1.59708000  |
| C  | 7.51631300   | 3.41025500  | 0.42674800  |
| O  | 7.34267600   | 4.62800900  | 0.27084500  |



|    |             |             |             |
|----|-------------|-------------|-------------|
| O  | 8.23973100  | 2.64039000  | -0.32321800 |
| C  | 4.52634900  | -1.24464800 | -0.07322000 |
| C  | 3.34158600  | -2.05687000 | 0.48555600  |
| H  | 9.62887600  | -2.38901100 | -1.61605000 |
| H  | 8.72025500  | -3.89475800 | -1.37186500 |
| H  | 11.79225200 | 0.78842200  | 0.77778600  |
| H  | 10.47081000 | 1.96458400  | 0.60178200  |
| H  | 6.84110100  | 3.35555700  | 2.49474200  |
| H  | 5.73803400  | 2.63186800  | 1.30868200  |
| H  | 4.16233100  | -0.26743900 | -0.38954400 |
| H  | 4.92459400  | -1.73370000 | -0.96709100 |
| H  | 2.42086900  | -1.72703500 | -0.01251300 |
| H  | 3.21793700  | -1.89180500 | 1.55901900  |
| N  | 3.55015100  | -3.50951700 | 0.29027900  |
| H  | 3.50627000  | -3.79244900 | -0.69043900 |
| O  | 7.43490600  | 1.22023700  | -2.98395600 |
| H  | 6.55762700  | 1.72871800  | -3.00526400 |
| H  | 7.22015500  | 0.31675200  | -3.30465100 |
| S  | 2.63638900  | -4.56611500 | 1.22444100  |
| O  | 2.98482400  | -5.91255600 | 0.74329900  |
| O  | 2.88176700  | -4.17430400 | 2.62270000  |
| C  | 0.90819400  | -4.27498100 | 0.87729100  |
| C  | 0.27676800  | -4.99795800 | -0.14225900 |
| C  | 0.21796000  | -3.29832300 | 1.60433900  |
| C  | -1.06083200 | -4.73152200 | -0.43222700 |
| H  | 0.82053500  | -5.76470600 | -0.68422500 |
| C  | -1.11814500 | -3.04161200 | 1.29361200  |
| H  | 0.71057500  | -2.76480800 | 2.41051600  |
| C  | -1.77528300 | -3.74720300 | 0.27305900  |
| H  | -1.55825400 | -5.29991700 | -1.21389800 |
| H  | -1.65951300 | -2.28746500 | 1.85902200  |
| Gd | 7.62789500  | 0.35692300  | -0.62184300 |
| N  | 7.31979300  | 1.36693600  | 1.86332500  |
| N  | 9.80863600  | -0.00001200 | 0.97414100  |
| N  | 8.21806500  | -2.27296600 | -0.06558600 |
| N  | 5.66446300  | -0.96866900 | 0.84872800  |
| C  | 10.36169900 | -1.37291600 | 0.84176400  |
| H  | 10.85341200 | -1.43575000 | -0.13134400 |
| H  | 11.13270900 | -1.55160200 | 1.60776600  |
| C  | 7.00497000  | -3.00765100 | 0.38104100  |
| H  | 7.28328700  | -3.98941800 | 0.79436200  |
| H  | 6.38008300  | -3.19583000 | -0.49474900 |
| C  | 8.63115000  | 1.52585900  | 2.54920300  |
| H  | 8.47823000  | 1.73473000  | 3.61922400  |
| H  | 9.11773100  | 2.40455100  | 2.11985800  |
| C  | 5.22925600  | -0.03986800 | 1.92536000  |
| H  | 4.64804400  | 0.74740400  | 1.43902500  |
| H  | 4.57147400  | -0.54494000 | 2.65039900  |
| C  | 9.53899600  | 0.31275500  | 2.39528600  |
| H  | 9.07116100  | -0.56486700 | 2.85127000  |
| H  | 10.47670100 | 0.49323400  | 2.94483100  |
| C  | 9.29166900  | -2.44936600 | 0.94259000  |
| H  | 9.76258700  | -3.43947700 | 0.83859700  |
| H  | 8.83055200  | -2.42706000 | 1.93348400  |
| C  | 6.21998200  | -2.21970500 | 1.42012000  |
| H  | 6.87953400  | -1.94755100 | 2.24711700  |
| H  | 5.42671400  | -2.85118000 | 1.84051800  |
| C  | 6.38678900  | 0.58095800  | 2.70975400  |

|   |              |             |             |
|---|--------------|-------------|-------------|
| H | 5.96410600   | 1.21465500  | 3.50482400  |
| H | 6.96589300   | -0.19773000 | 3.21282400  |
| N | -9.80862600  | 0.00009000  | 0.97415700  |
| N | -8.21813900  | 2.27301300  | -0.06570400 |
| N | -5.66457400  | 0.96889300  | 0.84874400  |
| N | -7.31976900  | -1.36675100 | 1.86342900  |
| C | -8.63112500  | -1.52565400 | 2.54934000  |
| H | -9.11767500  | -2.40439700 | 2.12006700  |
| H | -8.47816700  | -1.73441800 | 3.61937300  |
| C | -9.53898200  | -0.31258200 | 2.39533200  |
| H | -9.07117700  | 0.56507600  | 2.85127100  |
| H | -10.47669700 | -0.49304900 | 2.94486600  |
| C | -7.00509500  | 3.00778100  | 0.38090900  |
| H | -6.38018400  | 3.19598800  | -0.49485800 |
| H | -7.28348200  | 3.98954100  | 0.79420200  |
| C | -6.22013900  | 2.21993600  | 1.42007900  |
| H | -6.87972000  | 1.94783400  | 2.24707000  |
| H | -5.42688600  | 2.85144200  | 1.84045200  |
| C | -5.22928400  | 0.04013800  | 1.92538500  |
| H | -4.64803100  | -0.74709900 | 1.43904200  |
| H | -4.57152500  | 0.54525000  | 2.65041600  |
| C | -6.38678000  | -0.58070900 | 2.70981000  |
| H | -5.96410100  | -1.21435100 | 3.50492400  |
| H | -6.96589500  | 0.19801400  | 3.21281400  |
| C | -10.36174800 | 1.37296400  | 0.84168900  |
| H | -10.85344600 | 1.43570100  | -0.13143200 |
| H | -11.13278700 | 1.55166400  | 1.60765800  |
| C | -9.29176100  | 2.44945800  | 0.94244100  |
| H | -9.76269700  | 3.43955800  | 0.83839600  |
| H | -8.83065300  | 2.42723700  | 1.93334300  |
| C | 3.21180700   | 3.43004400  | -0.07944200 |
| H | 3.75970600   | 4.35675400  | -0.28843700 |
| H | 3.69614200   | 2.94607900  | 0.77361200  |
| C | -3.21174900  | -3.43061000 | -0.07993500 |
| H | -3.75932800  | -4.35733200 | -0.28966500 |
| H | -3.69644400  | -2.94728400 | 0.77327400  |
| C | -3.30245700  | -2.49809800 | -1.30915900 |
| H | -2.75547400  | -1.57181800 | -1.08984100 |
| H | -2.82639100  | -2.97139400 | -2.17254900 |
| C | 3.30258500   | 2.49830300  | -1.30919000 |
| H | 2.75527200   | 1.57202700  | -1.09062400 |
| H | 2.82685800   | 2.97221900  | -2.17243400 |
| C | 4.73999000   | 2.12988500  | -1.69145900 |
| O | 5.13171500   | 2.44406800  | -2.84746700 |
| O | 5.44097400   | 1.50545100  | -0.81585200 |
| C | -4.73993900  | -2.12996500 | -1.69138800 |
| O | -5.44091800  | -1.50548500 | -0.81580800 |
| O | -5.13187200  | -2.44472000 | -2.84715300 |

---

E(RTPSSh) = -5021.5652485 Hartree

Zero-point correction = 1.292363

Thermal correction to Energy = 1.378258

Thermal correction to Enthalpy = 1.379202

Thermal correction to Gibbs Free Energy = 1.165956

Sum of electronic and zero-point Energies = -5020.272886

Sum of electronic and thermal Energies = -5020.186991

Sum of electronic and thermal Enthalpies = -5020.186046

Sum of electronic and thermal Free Energies = -5020.399293

**Table S4.** Optimized Cartesian coordinates obtained for the SAP isomer of  $[\text{Gd}(\text{DO3A-SA-COO})(\text{H}_2\text{O})_2]$  (TPSSH/LCRECP/6-31G(d) level, aqueous solution, 0 imaginary frequencies).

|   |             |             |             |
|---|-------------|-------------|-------------|
| N | 7.77469000  | -2.20329500 | -0.02525300 |
| C | 9.13320800  | -2.22344800 | 0.58005600  |
| C | 9.24747800  | -1.29041700 | 1.78227300  |
| N | 8.94310300  | 0.12899700  | 1.46593900  |
| C | 8.62575500  | 0.85795900  | 2.72089200  |
| C | 7.19625300  | 0.59272500  | 3.18161800  |
| N | 6.17325300  | 1.00603800  | 2.18618800  |
| C | 4.86622600  | 0.37986700  | 2.52373300  |
| C | 4.80256200  | -1.10939900 | 2.18993400  |
| N | 4.94493600  | -1.39043000 | 0.73856200  |
| C | 5.38528900  | -2.79329700 | 0.51694700  |
| C | 6.86151600  | -3.01320500 | 0.81842500  |
| C | 7.82749900  | -2.75414200 | -1.40170500 |
| C | 6.67429100  | -2.30165900 | -2.31477900 |
| O | 6.19584500  | -1.11893300 | -2.07178800 |
| O | 6.32466500  | -3.04415100 | -3.24178700 |
| C | 10.09597600 | 0.75900100  | 0.78081800  |
| C | 10.16878900 | 0.42381000  | -0.71822400 |
| O | 11.27269100 | 0.45828900  | -1.28280800 |
| O | 9.03372500  | 0.17786700  | -1.28703400 |
| C | 6.04467200  | 2.48575100  | 2.17849500  |
| C | 7.08595700  | 3.21161200  | 1.30365700  |
| O | 7.35071900  | 4.39209900  | 1.57683900  |
| O | 7.56382900  | 2.53747700  | 0.30843500  |
| C | 3.67839800  | -1.13136200 | 0.00017600  |
| C | 2.45900300  | -2.02479700 | 0.30380900  |
| H | 8.74103400  | -2.37399600 | -1.87024300 |
| H | 7.88015300  | -3.85196600 | -1.39130400 |
| H | 11.04608200 | 0.49834300  | 1.26861000  |
| H | 9.96295400  | 1.84337600  | 0.84293800  |
| H | 6.07342000  | 2.89171700  | 3.19915700  |
| H | 5.07237600  | 2.73103900  | 1.74223000  |
| H | 3.39292400  | -0.09856200 | 0.19930800  |
| H | 3.92196800  | -1.18647800 | -1.06573400 |
| H | 9.84815100  | -1.93180100 | -0.18984500 |
| H | 9.39930400  | -3.24280800 | 0.90162300  |
| H | 10.26449800 | -1.37435200 | 2.19734700  |
| H | 8.56389600  | -1.61519200 | 2.57073600  |
| H | 9.31693900  | 0.57053400  | 3.52836100  |
| H | 8.77211200  | 1.92439100  | 2.53952800  |
| H | 7.02373400  | 1.11483900  | 4.13612100  |
| H | 7.06705200  | -0.47397900 | 3.38008400  |
| H | 4.63424400  | 0.51382100  | 3.59178400  |
| H | 4.10363600  | 0.91052200  | 1.95229900  |
| H | 5.59405400  | -1.64813400 | 2.71523700  |
| H | 3.85632900  | -1.50753000 | 2.58436000  |
| H | 5.16896400  | -3.04674500 | -0.52200300 |
| H | 4.80097000  | -3.48978000 | 1.13528800  |
| H | 7.06589200  | -2.77367100 | 1.86502500  |
| H | 7.08518800  | -4.08517600 | 0.69270200  |
| H | 1.55541600  | -1.46221500 | 0.03138500  |
| H | 2.38872800  | -2.27238100 | 1.36564900  |
| N | 2.52593600  | -3.30380700 | -0.43401600 |
| H | 2.55518100  | -3.18533800 | -1.44853200 |

|    |              |             |             |
|----|--------------|-------------|-------------|
| O  | 6.85637700   | 1.42628800  | -2.58267200 |
| H  | 5.97203300   | 1.92023800  | -2.62390800 |
| H  | 6.68230800   | 0.56112500  | -3.01080600 |
| S  | 1.42633000   | -4.50498300 | -0.03288600 |
| O  | 1.70825100   | -5.61933300 | -0.95087800 |
| O  | 1.52787000   | -4.67766200 | 1.42505600  |
| C  | -0.21948000  | -3.89748700 | -0.39301300 |
| C  | -0.75114700  | -4.08055000 | -1.67606200 |
| C  | -0.93352500  | -3.21994900 | 0.60121800  |
| C  | -2.01721700  | -3.57329800 | -1.95890800 |
| H  | -0.18734600  | -4.62165200 | -2.42872300 |
| C  | -2.19808200  | -2.71272400 | 0.29679600  |
| H  | -0.51440800  | -3.10890600 | 1.59556000  |
| C  | -2.74898200  | -2.88019200 | -0.98061700 |
| H  | -2.45889000  | -3.70779500 | -2.94001300 |
| H  | -2.76398300  | -2.19181500 | 1.05988200  |
| C  | -4.11692200  | -2.33651000 | -1.34146500 |
| O  | -4.55107300  | -2.63642100 | -2.48848500 |
| O  | -4.72495100  | -1.61669500 | -0.47699800 |
| Gd | 6.89477700   | 0.35106200  | -0.31227100 |
| N  | -7.77468300  | 2.20325500  | -0.02512500 |
| C  | -9.13319800  | 2.22333100  | 0.58018200  |
| C  | -9.24746300  | 1.29020400  | 1.78232700  |
| N  | -8.94310100  | -0.12919600 | 1.46592200  |
| C  | -8.62572500  | -0.85816800 | 2.72085900  |
| C  | -7.19623200  | -0.59287400 | 3.18156800  |
| N  | -6.17323900  | -1.00610800 | 2.18610000  |
| C  | -4.86621800  | -0.37990500 | 2.52363800  |
| C  | -4.80259500  | 1.10939000  | 2.18995900  |
| N  | -4.94488200  | 1.39054300  | 0.73859600  |
| C  | -5.38531200  | 2.79340200  | 0.51710000  |
| C  | -6.86155600  | 3.01318300  | 0.81858900  |
| C  | -7.82757400  | 2.75417200  | -1.40154600 |
| C  | -6.67445300  | 2.30169100  | -2.31472700 |
| O  | -6.19614500  | 1.11886900  | -2.07191200 |
| O  | -6.32454700  | 3.04439000  | -3.24146100 |
| C  | -10.09600100 | -0.75919600 | 0.78083900  |
| C  | -10.16887300 | -0.42403900 | -0.71821400 |
| O  | -11.27277900 | -0.45861900 | -1.28277900 |
| O  | -9.03384100  | -0.17797200 | -1.28703300 |
| C  | -6.04458200  | -2.48581400 | 2.17837800  |
| C  | -7.08584700  | -3.21172400 | 1.30355500  |
| O  | -7.35061900  | -4.39219400 | 1.57679300  |
| O  | -7.56378900  | -2.53760900 | 0.30834800  |
| C  | -3.67828300  | 1.13158000  | 0.00026000  |
| C  | -2.45893600  | 2.02507800  | 0.30388400  |
| H  | -8.74114100  | 2.37403200  | -1.87002500 |
| H  | -7.88022400  | 3.85199600  | -1.39109400 |
| H  | -11.04609100 | -0.49853900 | 1.26866400  |
| H  | -9.96297700  | -1.84357000 | 0.84296700  |
| H  | -6.07328200  | -2.89180000 | 3.19903400  |
| H  | -5.07228500  | -2.73104100 | 1.74208100  |
| H  | -3.39273100  | 0.09881100  | 0.19944200  |
| H  | -3.92180400  | 1.18663000  | -1.06566400 |
| H  | -9.84813800  | 1.93174900  | -0.18974500 |
| H  | -9.39930100  | 3.24266100  | 0.90183800  |
| H  | -10.26447900 | 1.37411800  | 2.19741500  |
| H  | -8.56387600  | 1.61492800  | 2.57080700  |

|    |             |             |             |
|----|-------------|-------------|-------------|
| H  | -9.31691100 | -0.57078100 | 3.52833900  |
| H  | -8.77204600 | -1.92460200 | 2.53947900  |
| H  | -7.02366600 | -1.11499800 | 4.13605600  |
| H  | -7.06707800 | 0.47383400  | 3.38005200  |
| H  | -4.63422100 | -0.51392400 | 3.59167700  |
| H  | -4.10362600 | -0.91050800 | 1.95215600  |
| H  | -5.59413200 | 1.64805500  | 2.71527000  |
| H  | -3.85639500 | 1.50752000  | 2.58446200  |
| H  | -5.16898200 | 3.04697600  | -0.52181600 |
| H  | -4.80103900 | 3.48985600  | 1.13551700  |
| H  | -7.06591600 | 2.77358400  | 1.86517800  |
| H  | -7.08529700 | 4.08514800  | 0.69293100  |
| H  | -1.55533500 | 1.46248200  | 0.03153800  |
| H  | -2.38870100 | 2.27275000  | 1.36570800  |
| N  | -2.52582100 | 3.30401600  | -0.43407100 |
| H  | -2.55500100 | 3.18544700  | -1.44857800 |
| O  | -6.85636600 | -1.42651000 | -2.58257300 |
| H  | -5.97212000 | -1.92063400 | -2.62376400 |
| H  | -6.68215400 | -0.56142000 | -3.01080700 |
| S  | -1.42624500 | 4.50523700  | -0.03301100 |
| O  | -1.70814200 | 5.61950100  | -0.95111500 |
| O  | -1.52783000 | 4.67805100  | 1.42491100  |
| C  | 0.21956800  | 3.89769700  | -0.39305000 |
| C  | 0.75127900  | 4.08072200  | -1.67608300 |
| C  | 0.93355800  | 3.22014600  | 0.60121400  |
| C  | 2.01734300  | 3.57342500  | -1.95888300 |
| H  | 0.18751700  | 4.62183300  | -2.42876600 |
| C  | 2.19811000  | 2.71288200  | 0.29684000  |
| H  | 0.51441400  | 3.10913300  | 1.59554800  |
| C  | 2.74906000  | 2.88032300  | -0.98055900 |
| H  | 2.45905300  | 3.70791100  | -2.93997300 |
| H  | 2.76397500  | 2.19197200  | 1.05994800  |
| C  | 4.11703800  | 2.33669900  | -1.34133900 |
| O  | 4.72502300  | 1.61680400  | -0.47689700 |
| O  | 4.55101300  | 2.63626200  | -2.48851200 |
| Gd | -6.89488300 | -0.35113700 | -0.31232100 |

---

E(RTPSSh) = -4864.3023017 Hartree

Zero-point correction = 1.178375

Thermal correction to Energy = 1.258969

Thermal correction to Enthalpy = 1.259913

Thermal correction to Gibbs Free Energy = 1.059552

Sum of electronic and zero-point Energies = -4863.123926

Sum of electronic and thermal Energies = -4863.043333

Sum of electronic and thermal Enthalpies = -4863.042388

Sum of electronic and thermal Free Energies = -4863.242750

**Table S5.** Optimized Cartesian coordinates obtained for the TSAP isomer of [Gd(DO3A-SA-COO)(H<sub>2</sub>O)]<sub>2</sub> (TPSSh/LCRECP/6-31G(d) level, aqueous solution, 0 imaginary frequencies).

|    |              |             |             |
|----|--------------|-------------|-------------|
| C  | 7.80819300   | -2.59081800 | -1.60400200 |
| C  | 7.04155800   | -1.82550400 | -2.69533500 |
| O  | 6.35163300   | -0.80259300 | -2.28167800 |
| O  | 7.15442800   | -2.19264800 | -3.87102600 |
| C  | 9.88679100   | 0.43120100  | 1.23381500  |
| C  | 10.09816500  | 0.64514300  | -0.27683600 |
| O  | 11.16907600  | 1.13265300  | -0.66539500 |
| O  | 9.09704500   | 0.30614700  | -1.02633400 |
| C  | 5.83950200   | 2.19681000  | 2.38800100  |
| C  | 6.76342400   | 3.08448900  | 1.52910900  |
| O  | 6.69857800   | 4.31224100  | 1.68217900  |
| O  | 7.52546700   | 2.45977400  | 0.68663000  |
| C  | 3.62035200   | -1.05133000 | -0.43175000 |
| C  | 2.33206400   | -1.87199000 | -0.22039300 |
| H  | 8.83572300   | -2.21365800 | -1.61463200 |
| H  | 7.83637100   | -3.66185700 | -1.85351900 |
| H  | 10.82625300  | 0.10139600  | 1.70154300  |
| H  | 9.61152400   | 1.39746900  | 1.66468500  |
| H  | 5.79432200   | 2.58975700  | 3.41431000  |
| H  | 4.83985500   | 2.26256700  | 1.95417100  |
| H  | 3.35235200   | 0.00094700  | -0.53062700 |
| H  | 4.09884500   | -1.34163400 | -1.37162600 |
| H  | 1.49302100   | -1.34796100 | -0.69453900 |
| H  | 2.10162000   | -1.97587700 | 0.84317700  |
| N  | 2.47074700   | -3.23830400 | -0.77413800 |
| H  | 2.47233000   | -3.26248300 | -1.79515800 |
| O  | 7.04505200   | 1.74638900  | -2.32639400 |
| H  | 6.21034700   | 2.31532300  | -2.35294300 |
| H  | 6.83182800   | 0.95125400  | -2.86405300 |
| S  | 1.46511200   | -4.44183800 | -0.17910600 |
| O  | 1.73999000   | -5.62537700 | -1.00858200 |
| O  | 1.68173600   | -4.46761700 | 1.27689800  |
| C  | -0.23330700  | -3.94458100 | -0.45380400 |
| C  | -0.84302400  | -4.22249300 | -1.68392400 |
| C  | -0.91173700  | -3.25493500 | 0.55658000  |
| C  | -2.15199400  | -3.79549700 | -1.89763900 |
| H  | -0.30574800  | -4.77274800 | -2.44936500 |
| C  | -2.21668300  | -2.82189700 | 0.31826000  |
| H  | -0.43168300  | -3.07555600 | 1.51246800  |
| C  | -2.84570000  | -3.08157700 | -0.90637800 |
| H  | -2.65434000  | -4.00702400 | -2.83509800 |
| H  | -2.75415800  | -2.29068300 | 1.09447300  |
| C  | -4.25667000  | -2.61069600 | -1.19520000 |
| O  | -4.81342300  | -3.10234400 | -2.21406500 |
| O  | -4.76906500  | -1.74300900 | -0.40483000 |
| Gd | 6.86624200   | 0.36534100  | -0.22111300 |
| C  | -7.80933000  | 2.59097900  | -1.60319900 |
| C  | -7.04415400  | 1.82495200  | -2.69502100 |
| O  | -6.35137800  | 0.80390000  | -2.28150400 |
| O  | -7.16059800  | 2.19009600  | -3.87099000 |
| C  | -9.88644500  | -0.43160100 | 1.23429900  |
| C  | -10.09792300 | -0.64523300 | -0.27638200 |
| O  | -11.16885800 | -1.13257700 | -0.66501700 |
| O  | -9.09675000  | -0.30621400 | -1.02584600 |

|    |              |             |             |
|----|--------------|-------------|-------------|
| C  | -5.83897700  | -2.19702800 | 2.38776300  |
| C  | -6.76269600  | -3.08461800 | 1.52854400  |
| O  | -6.69748300  | -4.31240600 | 1.68110300  |
| O  | -7.52491800  | -2.45977900 | 0.68630700  |
| C  | -3.62073600  | 1.05164200  | -0.43223900 |
| C  | -2.33224900  | 1.87205400  | -0.22111700 |
| H  | -8.83717100  | 2.21469000  | -1.61325600 |
| H  | -7.83691700  | 3.66200100  | -1.85290100 |
| H  | -10.82593400 | -0.10206000 | 1.70217300  |
| H  | -9.61101500  | -1.39792200 | 1.66495400  |
| H  | -5.79398500  | -2.59013400 | 3.41402000  |
| H  | -4.83925500  | -2.26268900 | 1.95411600  |
| H  | -3.35283100  | -0.00064100 | -0.53138700 |
| H  | -4.09944200  | 1.34216000  | -1.37194100 |
| H  | -1.49344000  | 1.34788200  | -0.69551300 |
| H  | -2.10150800  | 1.97579200  | 0.84240100  |
| N  | -2.47069500  | 3.23844300  | -0.77473200 |
| H  | -2.47225700  | 3.26276800  | -1.79574500 |
| O  | -7.04372600  | -1.74483800 | -2.32770300 |
| H  | -6.20908400  | -2.31381500 | -2.35402300 |
| H  | -6.82954200  | -0.94884300 | -2.86383200 |
| S  | -1.46499600  | 4.44181200  | -0.17951500 |
| O  | -1.73968500  | 5.62543700  | -1.00893500 |
| O  | -1.68176400  | 4.46750100  | 1.27647100  |
| C  | 0.23344600   | 3.94448300  | -0.45404500 |
| C  | 0.84331600   | 4.22253000  | -1.68405000 |
| C  | 0.91177200   | 3.25477000  | 0.55636900  |
| C  | 2.15234500   | 3.79561800  | -1.89762800 |
| H  | 0.30613100   | 4.77284400  | -2.44951200 |
| C  | 2.21675700   | 2.82179100  | 0.31818100  |
| H  | 0.43160200   | 3.07532600  | 1.51218900  |
| C  | 2.84593700   | 3.08162000  | -0.90635100 |
| H  | 2.65480600   | 4.00729600  | -2.83499000 |
| H  | 2.75416200   | 2.29053900  | 1.09441500  |
| C  | 4.25694700   | 2.61081600  | -1.19504700 |
| O  | 4.76913100   | 1.74272300  | -0.40498800 |
| O  | 4.81394800   | 3.10290400  | -2.21358200 |
| Gd | -6.86600600  | -0.36517500 | -0.22097400 |
| N  | -6.27230600  | -0.78117400 | 2.37304400  |
| N  | -8.79184900  | 0.53396900  | 1.47239000  |
| N  | -7.23649700  | 2.36160800  | -0.26016500 |
| N  | -4.64807000  | 1.10906000  | 0.64648000  |
| C  | -9.28194900  | 1.88274200  | 1.08398600  |
| H  | -9.90021200  | 1.76244700  | 0.19187900  |
| H  | -9.92881200  | 2.29655100  | 1.87325700  |
| C  | -5.93696200  | 3.07699500  | -0.16265400 |
| H  | -6.10409000  | 4.15029300  | 0.01750500  |
| H  | -5.42801400  | 2.98990200  | -1.12527000 |
| C  | -7.49530500  | -0.67859000 | 3.21880800  |
| H  | -7.21781000  | -0.64924000 | 4.28351200  |
| H  | -8.07380700  | -1.59226800 | 3.06474000  |
| C  | -4.13100600  | 0.44691100  | 1.87257400  |
| H  | -3.63916500  | -0.47097000 | 1.54632900  |
| H  | -3.37406700  | 1.06762300  | 2.37743400  |
| C  | -8.35448100  | 0.53375200  | 2.88658500  |
| H  | -7.79000800  | 1.45335700  | 3.06494400  |
| H  | -9.22089200  | 0.55797800  | 3.56657200  |
| C  | -8.15142000  | 2.85931000  | 0.79468600  |

|   |             |             |             |
|---|-------------|-------------|-------------|
| H | -8.57907400 | 3.83349500  | 0.51034900  |
| H | -7.56350100 | 3.03092600  | 1.70010300  |
| C | -5.05819800 | 2.50555700  | 0.94036100  |
| H | -5.60773200 | 2.50370100  | 1.88462800  |
| H | -4.18412700 | 3.15309300  | 1.08557200  |
| C | -5.21329800 | 0.11570700  | 2.89939100  |
| H | -4.72909300 | -0.33581100 | 3.77911000  |
| H | -5.69389000 | 1.03306300  | 3.24951100  |
| N | 8.79203500  | -0.53424500 | 1.47176400  |
| N | 7.23581300  | -2.36150000 | -0.26075800 |
| N | 4.64793100  | -1.10888800 | 0.64669300  |
| N | 6.27273400  | 0.78094600  | 2.37311400  |
| C | 7.49585500  | 0.67803200  | 3.21869100  |
| H | 8.07445400  | 1.59167700  | 3.06477900  |
| H | 7.21856000  | 0.64841900  | 4.28343100  |
| C | 8.35479900  | -0.53435900 | 2.88598800  |
| H | 7.79008700  | -1.45387000 | 3.06407600  |
| H | 9.22124600  | -0.55904500 | 3.56591800  |
| C | 5.93634700  | -3.07690700 | -0.16285200 |
| H | 5.42705400  | -2.98990100 | -1.12530300 |
| H | 6.10350300  | -4.15020600 | 0.01726700  |
| C | 5.05797900  | -2.50540800 | 0.94043100  |
| H | 5.60785400  | -2.50361600 | 1.88450800  |
| H | 4.18388000  | -3.15285800 | 1.08592700  |
| C | 4.13110700  | -0.44686400 | 1.87293600  |
| H | 3.63920500  | 0.47105000  | 1.54688400  |
| H | 3.37425200  | -1.06762400 | 2.37788000  |
| C | 5.21361300  | -0.11582700 | 2.89956200  |
| H | 4.72959200  | 0.33576800  | 3.77933700  |
| H | 5.69407800  | -1.03327500 | 3.24961200  |
| C | 9.28182800  | -1.88296800 | 1.08289400  |
| H | 9.89981600  | -1.76255500 | 0.19061300  |
| H | 9.92886900  | -2.29704400 | 1.87188600  |
| C | 8.15109500  | -2.85938300 | 0.79373000  |
| H | 8.57859500  | -3.83352800 | 0.50902800  |
| H | 7.56345500  | -3.03119900 | 1.69929100  |

---

E(RTPSSh) = -4864.3024836 Hartree

Zero-point correction = 1.178506

Thermal correction to Energy = 1.259006

Thermal correction to Enthalpy = 1.259950

Thermal correction to Gibbs Free Energy = 1.059749

Sum of electronic and zero-point Energies = -4863.123978

Sum of electronic and thermal Energies = -4863.043478

Sum of electronic and thermal Enthalpies = -4863.042533

Sum of electronic and thermal Free Energies = -4863.242735
